# Supplementary material for: Unraveling dynamically encoded latent transcriptomic patterns in pancreatic cancer cells by topic modeling
Source: PubMed Central journal article supplement — Cell Genom. 2023 Aug 23;3(9):100388. doi: 10.1016/j.xgen.2023.100388 (PMC10504675; doi:10.1016/j.xgen.2023.100388), 2023-08-23

**Cell Genomics, Volume 3**

**Supplemental information**

**Unraveling dynamically encoded  
latent transcriptomic patterns  
in pancreatic cancer cells by topic modeling**

**Yichen Zhang, Mohammadali (Sam) Khalilitousi, and Yongjin P. Park**

# Supplemental Information: Unravelling dynamically-encoded latent transcriptomic patterns in pancreatic cancer cells by topic modelling

Yichen Zhang, Mohammadali (Sam) Khalilitousi, and Yongjin P Park

## **Fig. S1: One-to-one matching results between the cell topics found by different methods, pertinent to Fig. 2B-D**

We ran a maximal matching algorithm to delineate cell topics only found by DeltaTopic from the other topics also found by BALSAM. As discussed in the main text, DeltaTopic provides novel insights into pancreatic cancer etiology. The bandwidths are proportional to the number of cells shared between the topics identified by the two methods. We omitted topics with too few cells to avoid visual clutter.

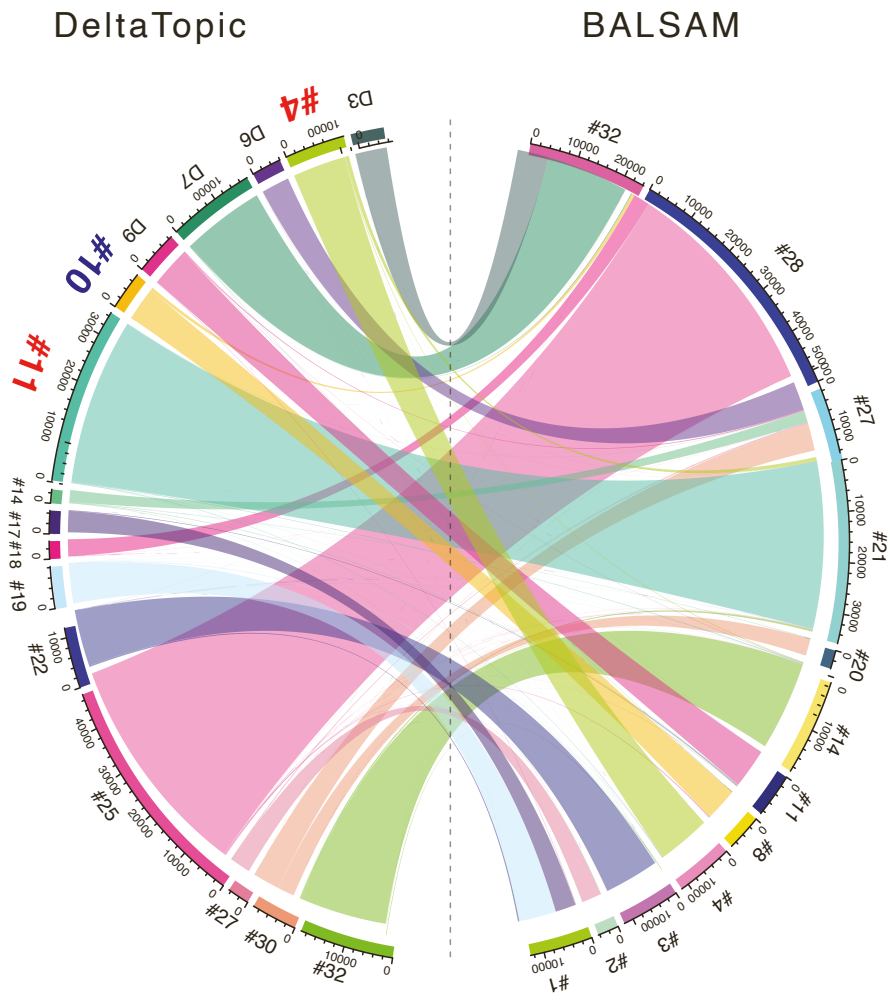

Supplement: mmc1.pdf [file mmc1.pdf]
